# Supplementary material for: AGC/AKT Protein Kinase SCH9 Is Critical to Pathogenic Development and Overwintering Survival in Magnaporthe oryzae
Source: J Fungi (Basel). 2022 Jul 31;8(8):810. doi: 10.3390/jof8080810 (PMC9410157; doi:10.3390/jof8080810)
Supplement: Supplementary file 1 [file jof-08-00810-s001.zip]

Archive with 5 entries (5 files):
- fig s1.tif
- fig s2.tif
- fig s3.tif
- Supplementary figures and table legends.pdf
- Table S1.xlsx
