# Supplementary material for: AGC/AKT Protein Kinase SCH9 Is Critical to Pathogenic Development and Overwintering Survival in Magnaporthe oryzae
Source: J Fungi (Basel). 2022 Jul 31;8(8):810. doi: 10.3390/jof8080810 (PMC9410157; doi:10.3390/jof8080810)
Supplement: Supplementary file 1 [file jof-08-00810-s001.zip › Table S1.xlsx]

## Sheet: a
			SCH9 functionally characterized in different fungal class
	Group	Class	Organism
	Fungi	Sordariomycetes	Pyricularia oryzae
		Sordariomycetes	Fusarium graminearum PH-1
		Sordariomycetes	Beauveria bassiana
		Sordariomycetes	Colletotrichum higginsianum
		Eurotiomycetes	Aspergillus fumigatus
		Saccharomycetes	Candida albicans
		Saccharomycetes	Saccharomyces cerevisiae
		Schizosaccharomycetes	Schizosaccharomyces pombe
		Basidiomycetes	Cryptococcus neoformans

## Sheet: b
		SCH9 used for phylogenetic analysis
	CLASS	ORGANISM	Protein ID	Given name	%protein identity	domain % identity-query covered	protein length (aa)	Serine/Threonine protein kinase catalytic domain ranged
1	Sordariomycetes	Pyricularia oryzae	XP_003714158.1	P. oryzae AGC/AKT (SCH9)	100	100%-100	903	498 -837
2	Sordariomycetes	Fusarium graminearum PH-1	XP_011316143.1	F. graminearum SCH9	59.05	90.06%-97	896	496-825
3	Sordariomycetes	Beauveria bassiana	AVJ54217.1	B. bassiana cAMP dependepant protein kinase like	74.5	89.16%-97	907	508-837
4	Eurotiomycetes	Aspergillus fumigatus	XP_750389.1	A. fumigatus SCH9	63.16	89.69%-77	875	477-738
5	Saccharomycetes	Candida albicans	XP_720953.2	C. albicans serine/threonine protein kinase	52.25	75.60%-97	787	398-719
6	Saccharomycetes	Saccharomyces cerevisiae	NP_012075.1	S. cerevisiae SCH9	62.22	74.70%-97	824	418-738
7	Schizosaccharomycetes	Schizosaccharomyces pombe	NP_593754.1	S. pombe Sck1	52.64	80.15%-77	696	302-563
8	Basidiomycetes	Cryptococcus neoformans	AAM21494.1	C. neoformans SCH9	46.55	70.55%-77	690	242-514

## Sheet: c
		5'-3'	Primers used in this study
	Knockout
	MoSch9 AF	TGGTTGGCACTGATGGAGC
	MoSch9 AR	GCAAATACGGGTGGATAGCA
	MoSch9 BF	ATAGGAAGGCGTTCTAAGGT
	MoSch9 BR	CACATCTGGGTCAGTCAATC
	MoSch9 OF	TTCGCCCTTTATCGTCAGCC
	MoSch9 OR	ATCGTCCCAATCGTGGTCTT
	MoSch9 UAH F	GTTGGGTAGGCCCGTTTA
	MoSch9 UAH R	TTTCCACTATCGGCGAGTA
	MoSch9 COMP F	GAACGCTTGTCCTATCCA
	MoSch9 COMP R	CATGTCAAACTGCGAATTG
	qPCR
	ACTIN F	CCATGTACCCTGGTCTTTCG
	ACTIN R	TTCGAGATCCACATCTGCTG
	MoSch9 F	GTTCCCATCTCACGTTCAGG
	MoSch9 R	GTCAAAGACAGCTTCCGCAT
	Rsy1 F	CGACTCCAAGGACTGGGATA
	Rsy1 R	GTCCTCGGACACCTTCTCC
	Buf1 F	ACGCCGTCTACTCAGGATCA
	Buf1 R	TCTCGCCGTTTGGAATGTAT
	COS1 F	TGTGGTTCCTGTCCCTTCTC
	COS1 R	TGTAGCCTGGCGAGTCCAAC
	COM1 F	TGAGCGATGACATGCTTGAG
	COM1 R	GAGTGATGGGTGCTGTGTTG
	CON6 F	AGTCCAAGCAGCACTCGAAG
	CON6 R	CTTGATGGCAGCCTTGAGAC
	CON7 F	CACCACCAGCTTTCCTCATC
	CON7 R	AACCTGACTGCGAGTAATCC
	HOX6 F	TTCCCTTCCCAGTTCACTTC
	HOX6 R	GCTGCTACCGGGAGAATTTG
	MHP1 F	CACCATCATCGCCACCATC
	MHP1 R	CAGCACTGAGCAGAGCCGTA
	MPG1 F	GAAGGTCGTCTCTTGCTGCA
	MPG1 R	GGATGTTGACCAGACCAATC
	MGG09134 F	GCAGCGGAGCCTACAACAA
	MGG09134 R	TCCAAGAACAGGGAGCAGACA
	Hyp qF	AGGTTATTTGCGAGAAAGGACA
	Hyp qR	CATCGTCAGAGGAGGTAGCG
	Gpd qF	AACGGTTTCGGTCGTATCGG
	Gpd qR	GCATGTATTTGGCGTACTTGGG
	Trans qF	GAAGACTTACATCAGCGACG
	Trans qR	GGCGAACTTGCTAATACCCT
	Cat qF	TGTTCCCGTTCCATTCACTCC
	Cat qR	GCGGTCCACCATGATCTGT
	Snod qF	GTCGGTGGATGGAACTCGC
	Snod qR	GTTGATGGACTTGCCGTTGTAG
